# Supplementary material
Source: HighWire-hosted journal article supplement (https://www.life-science-alliance.org/content/2/5/e201900413/F7)

### Fig 4C

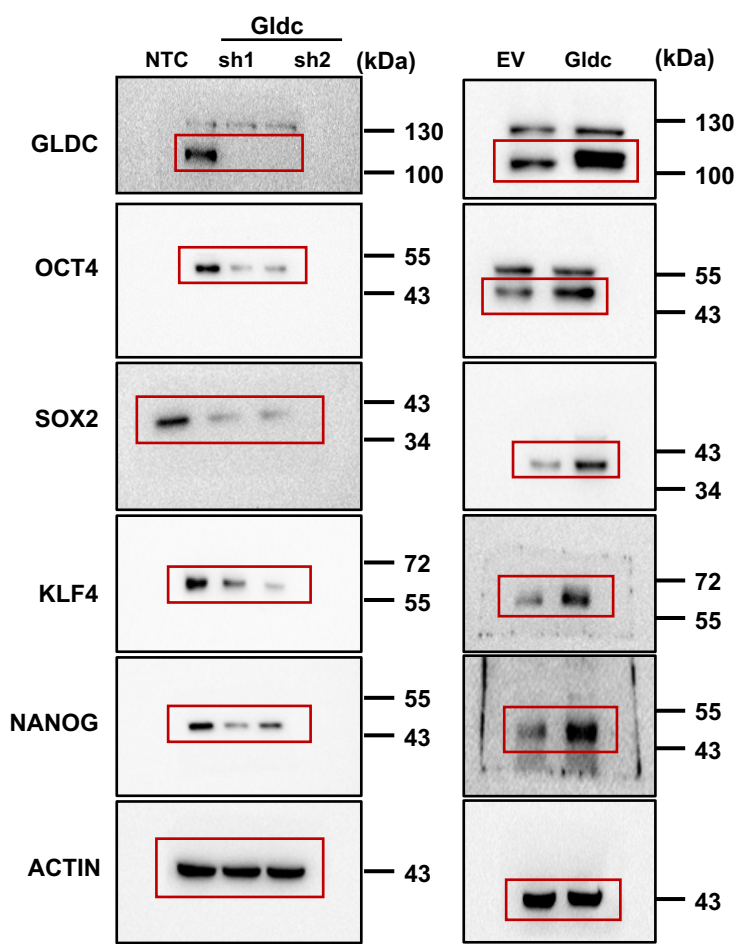

### Fig 4E

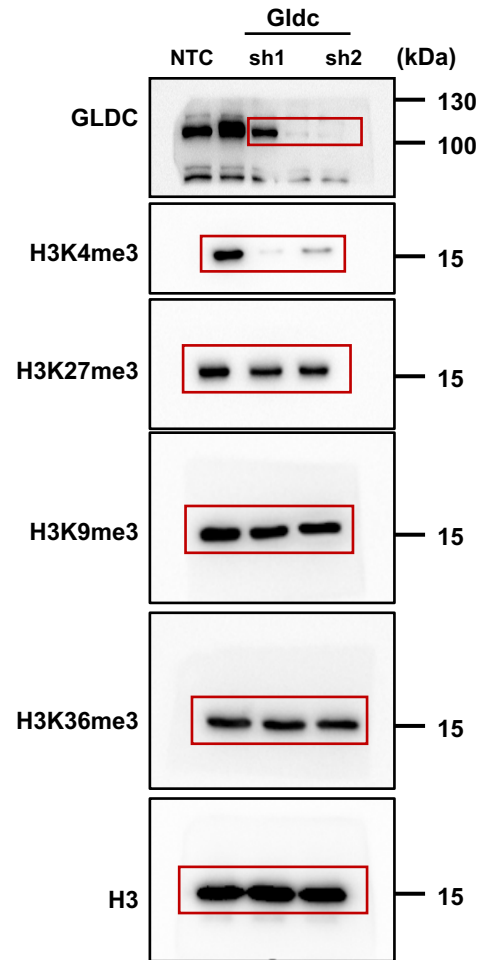

### Fig 4G

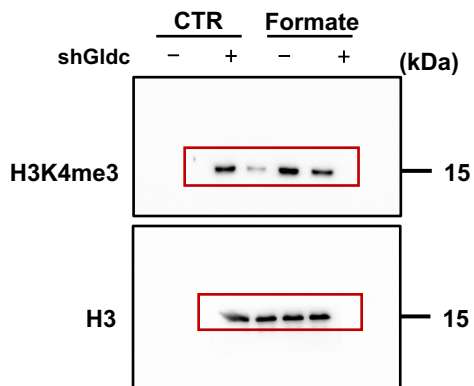

Supplement: inline-supplementary-material-6 [file inline-supplementary-material-6.pdf]
